# Supplementary material for: The cost of flares among patients with systemic lupus erythematosus with and without lupus nephritis in the United States
Source: PubMed Central journal article supplement — Lupus. 2022 Dec 21;32(2):301–9. doi: 10.1177/09612033221146093 (PMC9939932; doi:10.1177/09612033221146093), 2022-12-21
Supplement: sj-pdf-1-lup-10.1177_09612033221146093.pdf [file sj-pdf-1-lup-10.1177_09612033221146093.pdf]

## **Supplementary Material**

### **Methods**

#### **SLE-related conditions**

The presence of the following SLE-related conditions was used in the definition of moderate SLE flares:

- Acute pancreatitis
- Arthritis/arthralgia
- Chorioretinitis
- Demyelinating syndrome/acute inflammatory demyelinating polyradiculoneuropathy
- Dry eye/tear film insufficiency
- Episcleritis/scleritis
- Hemolytic anemia
- Hepatitis (non-viral)
- Ischemic necrosis of bone
- Nephritis
- Renal impairment other than nephritis or end stage renal disease
- Low white blood cell count (leukopenia, neutropenia, lymphocytopenia)
- Lupus enteritis/colitis
- Lymph node enlargement
- Mononeuropathy/polyneuropathy
- Myalgia/myositis
- Myelopathy

- Myocarditis
- Pericarditis
- Pleurisy/pleural effusion
- Pseudotumor cerebri
- Rash
- Seizure
- Urticaria
- Uveitis
- Vasculitis (excluding aortitis)

The presence of the following SLE-related conditions was used for the definition of severe SLE flares:

- Any moderate SLE-related condition
- Acute confusional state/psychosis
- Aortitis
- Arterial/venous thrombosis
- Aseptic meningitis
- Cardiac tamponade
- Cranial neuropathy
- Intestinal pseudo-obstruction
- End stage renal disease
- Optic neuritis

## Supplementary Tables

Supplementary Table 1. ICD-9-CM and ICD-10-CM renal diagnosis codes

| ICD9-CM | Description                                                                    |
|---------|--------------------------------------------------------------------------------|
| 580     | Acute glomerulonephritis with lesion of proliferative glomerulonephritis       |
| 580.4   | Acute glomerulonephritis with lesion of rapidly progressive glomerulonephritis |
| 580.8   | Acute glomerulonephritis with other specified pathological lesion in kidney    |
| 580.81  | Acute glomerulonephritis in diseases classified elsewhere                      |
| 580.89  | Acute glomerulonephritis with other specified pathological lesion in kidney    |
| 581     | Nephrotic syndrome with lesion of proliferative glomerulonephritis             |
| 581.1   | Nephrotic syndrome with lesion of membranous glomerulonephritis                |
| 581.2   | Nephrotic syndrome with lesion of membranoproliferative glomerulonephritis     |
| 581.3   | Nephrotic syndrome with lesion of minimal change glomerulonephritis            |
| 581.8   | Nephrotic syndrome with other specified pathological lesion in kidney          |
| 581.81  | Nephrotic syndrome in diseases classified elsewhere                            |
| 581.89  | Nephrotic syndrome with other specified pathological lesion in kidney          |
| 581.9   | Nephrotic syndrome with unspecified pathological lesion in kidney              |
| 582     | Chronic glomerulonephritis with lesion of proliferative glomerulonephritis     |

|        |                                                                                                                       |
|--------|-----------------------------------------------------------------------------------------------------------------------|
| 582.1  | Chronic glomerulonephritis with lesion of membranous glomerulonephritis                                               |
| 582.2  | Chronic glomerulonephritis with lesion of membranoproliferative glomerulonephritis                                    |
| 582.4  | Chronic glomerulonephritis with lesion of rapidly progressive glomerulonephritis                                      |
| 582.8  | Chronic glomerulonephritis with other specified pathological lesion in kidney                                         |
| 582.81 | Chronic glomerulonephritis in diseases classified elsewhere                                                           |
| 582.89 | Chronic glomerulonephritis with other specified pathological lesion in kidney                                         |
| 582.9  | Chronic glomerulonephritis with unspecified pathological lesion in kidney                                             |
| 583    | Nephritis and nephropathy, not specified as acute or chronic, with lesion of proliferative glomerulonephritis         |
| 583.1  | Nephritis and nephropathy, not specified as acute or chronic, with lesion of membranous glomerulonephritis            |
| 583.2  | Nephritis and nephropathy, not specified as acute or chronic, with lesion of membranoproliferative glomerulonephritis |
| 583.4  | Nephritis and nephropathy, not specified as acute or chronic, with lesion of rapidly progressive glomerulonephritis   |
| 583.6  | Nephritis and nephropathy, not specified as acute or chronic, with lesion of renal cortical necrosis                  |
| 583.7  | Nephritis and nephropathy, not specified as acute or chronic, with lesion of renal medullary necrosis                 |

|        |                                                                                                                  |
|--------|------------------------------------------------------------------------------------------------------------------|
| 583.8  | Nephritis and nephropathy not specified as acute or chronic with other specified pathological lesion in kidney   |
| 583.81 | Nephritis and nephropathy, not specified as acute or chronic, in diseases classified elsewhere                   |
| 583.89 | Nephritis and nephropathy, not specified as acute or chronic, with other specified pathological lesion in kidney |
| 583.9  | Nephritis and nephropathy, not specified as acute or chronic, with unspecified pathological lesion in kidney     |
| 584.5  | Acute kidney failure with lesion of tubular necrosis                                                             |
| 584.6  | Acute kidney failure with lesion of renal cortical necrosis                                                      |
| 584.7  | Acute kidney failure with lesion of renal medullary [papillary] necrosis                                         |
| 584.8  | Acute kidney failure with other specified pathological lesion in kidney                                          |
| 584.9  | Acute kidney failure, unspecified                                                                                |
| 585.1  | Chronic kidney disease, Stage I                                                                                  |
| 585.2  | Chronic kidney disease, Stage II                                                                                 |
| 585.3  | Chronic kidney disease, Stage III                                                                                |
| 585.4  | Chronic kidney disease, Stage IV                                                                                 |
| 585.5  | Chronic kidney disease, Stage V                                                                                  |
| 585.6  | End stage renal disease                                                                                          |

|                 |                                                                                      |
|-----------------|--------------------------------------------------------------------------------------|
| 585.9           | Chronic kidney disease, unspecified                                                  |
| 586             | Renal failure, unspecified                                                           |
| 791             | Proteinuria                                                                          |
| <b>ICD10-CM</b> | <b>Description</b>                                                                   |
| M3214           | Glomerular disease in systemic lupus erythematosus                                   |
| M3215           | Tubulo-interstitial nephropathy in systemic lupus erythematosus                      |
| N00             | Acute nephritic syndrome                                                             |
| N000            | Acute nephritic syndrome with minor glomerular abnormality                           |
| N001            | Acute nephritic syndrome with focal and segmental glomerular lesions                 |
| N002            | Acute nephritic syndrome with diffuse membranous glomerulonephritis                  |
| N003            | Acute nephritic syndrome with diffuse mesangial proliferative glomerulonephritis     |
| N004            | Acute nephritic syndrome with diffuse endocapillary proliferative glomerulonephritis |
| N005            | Acute nephritic syndrome with diffuse mesangiocapillary glomerulonephritis           |
| N006            | Acute nephritic syndrome with dense deposit disease                                  |
| N007            | Acute nephritic syndrome with diffuse crescentic glomerulonephritis                  |
| N008            | Acute nephritic syndrome with other morphologic changes                              |
| N009            | Acute nephritic syndrome with unspecified morphologic changes                        |
| N01             | Rapidly progressive nephritic syndrome                                               |

|      |                                                                                                    |
|------|----------------------------------------------------------------------------------------------------|
| N010 | Rapidly progressive nephritic syndrome with minor glomerular abnormality                           |
| N011 | Rapidly progressive nephritic syndrome with focal and segmental glomerular lesions                 |
| N012 | Rapidly progressive nephritic syndrome with diffuse membranous glomerulonephritis                  |
| N013 | Rapidly progressive nephritic syndrome with diffuse mesangial proliferative glomerulonephritis     |
| N014 | Rapidly progressive nephritic syndrome with diffuse endocapillary proliferative glomerulonephritis |
| N015 | Rapidly progressive nephritic syndrome with diffuse mesangiocapillary glomerulonephritis           |
| N016 | Rapidly progressive nephritic syndrome with dense deposit disease                                  |
| N017 | Rapidly progressive nephritic syndrome with diffuse crescentic glomerulonephritis                  |
| N018 | Rapidly progressive nephritic syndrome with other morphologic changes                              |
| N019 | Rapidly progressive nephritic syndrome with unspecified morphologic changes                        |
| N02  | Recurrent and persistent hematuria                                                                 |
| N020 | Recurrent and persistent hematuria with minor glomerular abnormality                               |
| N021 | Recurrent and persistent hematuria with focal and segmental glomerular lesions                     |
| N022 | Recurrent and persistent hematuria with diffuse membranous glomerulonephritis                      |
| N023 | Recurrent and persistent hematuria with diffuse mesangial proliferative glomerulonephritis         |
| N024 | Recurrent and persistent hematuria with diffuse endocapillary proliferative                        |

|      |                                                                                        |
|------|----------------------------------------------------------------------------------------|
|      | glomerulonephritis                                                                     |
| N025 | Recurrent and persistent hematuria with diffuse mesangiocapillary glomerulonephritis   |
| N026 | Recurrent and persistent hematuria with dense deposit disease                          |
| N027 | Recurrent and persistent hematuria with diffuse crescentic glomerulonephritis          |
| N028 | Recurrent and persistent hematuria with other morphologic changes                      |
| N029 | Recurrent and persistent hematuria with unspecified morphologic changes                |
| N03  | Chronic nephritic syndrome                                                             |
| N030 | Chronic nephritic syndrome with minor glomerular abnormality                           |
| N031 | Chronic nephritic syndrome with focal and segmental glomerular lesions                 |
| N032 | Chronic nephritic syndrome with diffuse membranous glomerulonephritis                  |
| N033 | Chronic nephritic syndrome with diffuse mesangial proliferative glomerulonephritis     |
| N034 | Chronic nephritic syndrome with diffuse endocapillary proliferative glomerulonephritis |
| N035 | Chronic nephritic syndrome with diffuse mesangiocapillary glomerulonephritis           |
| N036 | Chronic nephritic syndrome with dense deposit disease                                  |
| N037 | Chronic nephritic syndrome with diffuse crescentic glomerulonephritis                  |
| N038 | Chronic nephritic syndrome with other morphologic changes                              |
| N039 | Chronic nephritic syndrome with unspecified morphologic changes                        |
| N04  | Nephrotic syndrome                                                                     |



|      |                                                                                            |
|------|--------------------------------------------------------------------------------------------|
| N040 | Nephrotic syndrome with minor glomerular abnormality                                       |
| N041 | Nephrotic syndrome with focal and segmental glomerular lesions                             |
| N042 | Nephrotic syndrome with diffuse membranous glomerulonephritis                              |
| N043 | Nephrotic syndrome with diffuse mesangial proliferative glomerulonephritis                 |
| N044 | Nephrotic syndrome with diffuse endocapillary proliferative glomerulonephritis             |
| N045 | Nephrotic syndrome with diffuse mesangiocapillary glomerulonephritis                       |
| N046 | Nephrotic syndrome with dense deposit disease                                              |
| N047 | Nephrotic syndrome with diffuse crescentic glomerulonephritis                              |
| N048 | Nephrotic syndrome with other morphologic changes                                          |
| N049 | Nephrotic syndrome with unspecified morphologic changes                                    |
| N05  | Unspecified nephritic syndrome                                                             |
| N050 | Unspecified nephritic syndrome with minor glomerular abnormality                           |
| N051 | Unspecified nephritic syndrome with focal and segmental glomerular lesions                 |
| N052 | Unspecified nephritic syndrome with diffuse membranous glomerulonephritis                  |
| N053 | Unspecified nephritic syndrome with diffuse mesangial proliferative glomerulonephritis     |
| N054 | Unspecified nephritic syndrome with diffuse endocapillary proliferative glomerulonephritis |
| N055 | Unspecified nephritic syndrome with diffuse mesangiocapillary glomerulonephritis           |
| N056 | Unspecified nephritic syndrome with dense deposit disease                                  |

|      |                                                                                              |
|------|----------------------------------------------------------------------------------------------|
| N057 | Unspecified nephritic syndrome with diffuse crescentic glomerulonephritis                    |
| N058 | Unspecified nephritic syndrome with other morphologic changes                                |
| N059 | Unspecified nephritic syndrome with unspecified morphologic changes                          |
| N06  | Isolated proteinuria with specified morphological lesion                                     |
| N060 | Isolated proteinuria with minor glomerular abnormality                                       |
| N061 | Isolated proteinuria with focal and segmental glomerular lesions                             |
| N062 | Isolated proteinuria with diffuse membranous glomerulonephritis                              |
| N063 | Isolated proteinuria with diffuse mesangial proliferative glomerulonephritis                 |
| N064 | Isolated proteinuria with diffuse endocapillary proliferative glomerulonephritis             |
| N065 | Isolated proteinuria with diffuse mesangiocapillary glomerulonephritis                       |
| N066 | Isolated proteinuria with dense deposit disease                                              |
| N067 | Isolated proteinuria with diffuse crescentic glomerulonephritis                              |
| N068 | Isolated proteinuria with other morphologic lesion                                           |
| N069 | Isolated proteinuria with unspecified morphologic lesion                                     |
| N07  | Hereditary nephropathy, not elsewhere classified                                             |
| N070 | Hereditary nephropathy, not elsewhere classified with minor glomerular abnormality           |
| N071 | Hereditary nephropathy, not elsewhere classified with focal and segmental glomerular lesions |

|      |                                                                                                              |
|------|--------------------------------------------------------------------------------------------------------------|
| N072 | Hereditary nephropathy, not elsewhere classified with diffuse membranous glomerulonephritis                  |
| N073 | Hereditary nephropathy, not elsewhere classified with diffuse mesangial proliferative glomerulonephritis     |
| N074 | Hereditary nephropathy, not elsewhere classified with diffuse endocapillary proliferative glomerulonephritis |
| N075 | Hereditary nephropathy, not elsewhere classified with diffuse mesangiocapillary glomerulonephritis           |
| N076 | Hereditary nephropathy, not elsewhere classified with dense deposit disease                                  |
| N077 | Hereditary nephropathy, not elsewhere classified with diffuse crescentic glomerulonephritis                  |
| N078 | Hereditary nephropathy, not elsewhere classified with other morphologic lesions                              |
| N079 | Hereditary nephropathy, not elsewhere classified with unspecified morphologic lesions                        |
| N08  | Glomerular disorders in diseases classified elsewhere                                                        |
| N17  | Acute kidney failure                                                                                         |
| N170 | Acute kidney failure with tubular necrosis                                                                   |
| N171 | Acute kidney failure with acute cortical necrosis                                                            |
| N172 | Acute kidney failure with medullary necrosis                                                                 |
| N178 | Other acute kidney failure                                                                                   |

|      |                                            |
|------|--------------------------------------------|
| N179 | Acute kidney failure, unspecified          |
| N18  | Chronic kidney disease                     |
| N181 | Chronic kidney disease, stage 1            |
| N182 | Chronic kidney disease, stage 2 (mild)     |
| N183 | Chronic kidney disease, stage 3 (moderate) |
| N184 | Chronic kidney disease, stage 4 (severe)   |
| N185 | Chronic kidney disease, stage 5            |
| N186 | End stage renal disease                    |
| N189 | Chronic kidney disease, unspecified        |
| N19  | Unspecified kidney failure                 |

**Supplementary Table 2. Patient attrition**

| <b>Inclusion Criteria</b>                                                                              | <b>N</b> | <b>% Remaining</b> |
|--------------------------------------------------------------------------------------------------------|----------|--------------------|
| 1. Met SLE diagnosis criteria during the study period; and index date during the identification period | 53,373   |                    |
| 2. Age $\geq$ 18 years on index date                                                                   | 46,140   | 86.5               |
| 3. Continuous health plan enrollment during the baseline period, and follow-up period                  | 15,928   | 34.5               |
| 4. No ICD-10 diagnosis code for M32.0 during the study period                                          | 15,392   | 96.6               |
| <b>Final overall SLE sample size<sup>a</sup></b>                                                       | 15,392   | 100.0              |
| LN cohort                                                                                              | 2916     | 18.9               |
| Non-LN cohort                                                                                          | 8747     | 56.8               |

<sup>a</sup>Patient numbers for the LN and Non-LN cohorts do not total the final overall SLE sample size as patients with historical LN, and those who developed LN during the study were excluded

ICD, international classification of diseases; LN, lupus nephritis; SLE, systemic lupus erythematosus
